# Supplementary material for: Improvement of Acetaldehyde Production in Zymomonas mobilis by Engineering of Its Aerobic Metabolism
Source: Front Microbiol. 2019 Nov 14;10:2533. doi: 10.3389/fmicb.2019.02533 (PMC6868117; doi:10.3389/fmicb.2019.02533)
Supplement: Supplementary file 4 [file Data_Sheet_1.xlsx]

## Sheet: reactions
No	reaction	reaction name	pathway	reaction equation	reversibility	lower bound	upper bound
2	GLK	glucokinase	A ED pathway	1 atp[c] + 1 glc[c] -> 1 g6p[c] + 1 adp[c] + 1 h[c]	0	0	100000
4	G6PDH_nadp	glucose-6-phosphate dehydrogenase (NADP-dependent)	A ED pathway	1 g6p[c] + 1 nadp[c] -> 1 h[c] + 1 gl6p[c] + 1 nadph[c]	0	0	100000
5	G6PDH_nad	glucose-6-phosphate dehydrogenase (NAD-dependent)	A ED pathway	1 g6p[c] + 1 nad[c] -> 1 h[c] + 1 gl6p[c] + 1 nadh[c]	0	0	100000
6	PGL	6-phosphogluconolactonase	A ED pathway	1 gl6p[c] + 1 h2o[c] -> 1 h[c] + 1 pgl[c]	0	0	100000
7	EDD	phosphogluconate dehydratase	A ED pathway	1 pgl[c] -> 1 h2o[c] + 1 dgp[c]	0	0	100000
13	KDPGA	2-keto-3-Deoxy-6-phosphogluconate aldolase	A ED pathway	1 dgp[c] -> 1 gap[c] + 1 pyr[c]	0	0	100000
15	GAPDH	glyceraldehyde-3-phosphate dehydrogenase (phosphorylating)	A ED pathway	1 nad[c] + 1 gap[c] + 1 pi[c] -> 1 h[c] + 1 nadh[c] + 1 13dpg[c]	1	-100000	100000
16	PGK	phosphoglycerate kinase	A ED pathway	1 adp[c] + 1 13dpg[c] -> 1 atp[c] + 1 3pg[c]	1	-100000	100000
17	PGM	phosphoglycerate mutase	A ED pathway	1 3pg[c] -> 1 2pg[c]	1	-100000	100000
18	ENO	a83 - enolase	A ED pathway	1 2pg[c] -> 1 h2o[c] + 1 pep[c]	1	-100000	100000
19	PYK	pyruvate kinase	A ED pathway	1 adp[c] + 1 h[c] + 1 pep[c] -> 1 atp[c] + 1 pyr[c]	0	0	100000
20	PDC	pyruvate decarboxylase	B fermentation	1 h[c] + 1 pyr[c] -> 1 co2[c] + 1 acald[c]	0	0	100000
22	ADH	alcohol dehydrogenase I (ethanol)	B fermentation	1 h[c] + 1 nadh[c] + 1 acald[c] -> 1 nad[c] + 1 etoh[c]	1	-100000	100000
23	ACDH_nad	acetaldehyde dehydrogenase (NAD-dependent)	B fermentation	1 nad[c] + 1 h2o[c] + 1 acald[c] -> 2 h[c] + 1 nadh[c] + 1 ac[c]	1	-100000	100000
24	ACDH_nadp	acetaldehyde dehydrogenase (NADP-dependent)	B fermentation	1 nadp[c] + 1 h2o[c] + 1 acald[c] -> 2 h[c] + 1 nadph[c] + 1 ac[c]	1	-100000	100000
25	LDH	D-lactate dehydrogenase, NAD-dependent D-lactate dehydrogenase	B fermentation	1 h[c] + 1 nadh[c] + 1 pyr[c] -> 1 nad[c] + 1 lac[c]	0	0	100000
45	PDC2	pyruvate decarboxylase	B fermentation	1 h[c] + 1 pyr[c] + 1 acald[c] -> 1 co2[c] + 1 acin[c]	0	0	100000
26	MLDH	membrane D-lactate dehydrogenase	C respiration	1 lac[c] + 1 q[c] -> 1 pyr[c] + 1 qh2[c]	0	0	5000
27	RNDH_nadh	type II respiratory NADH dehydrogenase	C respiration	1 h[c] + 1 nadh[c] + 1 q[c] -> 1 nad[c] + 1 qh2[c]	0	0	100000
28	RNDH_nadph	type II respiratory NADPH dehydrogenase	C respiration	1 h[c] + 1 nadph[c] + 1 q[c] -> 1 nadp[c] + 1 qh2[c]	0	0	100000
29	UO	cyt bd ubiquinol oxidase	C respiration	2 qh2[c] + 1 o2[c] -> 4 h[c] + 2 h2o[c] + 2 q[c]	0	0	100000
49	PQQ	glucose-sorbosone dehydrogenase (PQQ)	C respiration	1 q[c] + 1 glc[e] -> 1 qh2[c] + 1 gllc[e]	0	0	100000
44	ATPGMD	ATP for growth, maintenance and dissipation	D growth	1 atp[c] + 1 h2o[c] -> 1 adp[c] + 1 h[c] + 1 pi[c]	0	0	100000
52	Biomass	biomass synthesis	D growth	0.055 f6p[c] + 0.154 g6p[c] + 23.107 nadph[c] + 0.135 e4p[c] + 0.12 gap[c] + 0.823 r5p[c] + 3.665 pyr[c] + 1.705 3pg[c] + 0.244 pep[c] + 2.4 accoa[c] + 1.723 oaa[c] + 0.821 akg[c] -> 23.107 nadp[c] + 2.135 co2[c] + 2.4 coa[c] + 1 biomass[c]	0	0	100000
8	GND	6-phosphogluconate dehydrogenase	E pentose phosphate pathway	1 nadp[c] + 1 pgl[c] -> 1 nadph[c] + 1 co2[c] + 1 ru5p[c]	0	0	0
9	TKT2	transketolase II	E pentose phosphate pathway	1 xylu5p[c] + 1 e4p[c] -> 1 f6p[c] + 1 gap[c]	1	-100000	100000
10	TKT1	transketolase I	E pentose phosphate pathway	1 xylu5p[c] + 1 r5p[c] -> 1 gap[c] + 1 s7p[c]	1	-100000	100000
11	RPE	ribulose-5-phosphate epimerase	E pentose phosphate pathway	1 xylu5p[c] -> 1 ru5p[c]	1	-100000	100000
12	RPI	ribose 5-phosphate isomerase	E pentose phosphate pathway	1 ru5p[c] -> 1 r5p[c]	1	-100000	100000
97	TAL	transaldolase	E pentose phosphate pathway	1 gap[c] + 1 s7p[c] -> 1 f6p[c] + 1 e4p[c]	1	0	0
21	PDH	pyruvate dehydrogenase complex	F TCA	1 nad[c] + 1 pyr[c] + 1 coa[c] -> 1 nadh[c] + 1 co2[c] + 1 accoa[c]	0	0	100000
30	CS	citrate (Si)-synthase	F TCA	1 h2o[c] + 1 accoa[c] + 1 oaa[c] -> 1 h[c] + 1 coa[c] + 1 cit[c]	0	0	100000
31	CL	citrate (pro-3S)-lyase, citrate lyase subunit beta	F TCA	1 cit[c] -> 1 ac[c] + 1 oaa[c]	0	0	100000
32	ACO1	aconitate hydratase	F TCA	1 cit[c] -> 1 h2o[c] + 1 cis-aconitate[c]	1	-100000	100000
33	ACO2	aconitate hydratase	F TCA	1 h2o[c] + 1 cis-aconitate[c] -> 1 icit[c]	1	-100000	100000
34	ICDH	isocitrate dehydrogenase (NADP+)	F TCA	1 nadp[c] + 1 icit[c] -> 1 nadph[c] + 1 co2[c] + 1 akg[c]	0	0	100000
35	FUM	fumarate hydratase	F TCA	1 mal[c] -> 1 h2o[c] + 1 fum[c]	0	0	100000
36	MDH	malate dehydrogenase (oxaloacetate-decarboxylating)	F TCA	1 nad[c] + 1 mal[c] -> 1 nadh[c] + 1 co2[c] + 1 pyr[c]	1	-100000	100000
37	PEPC	phosphoenolpyruvate carboxylase	F TCA	1 pep[c] + 1 hco3[c] -> 1 pi[c] + 1 oaa[c]	1	-100000	100000
53	EX_biomass	biomass export	G export	1 biomass[c] ->	0	0	100000
72	EX_sbt	sorbitol export	G export	1 sbt[e] ->	0	0	100000
73	EX_glyc	glycerol export	G export	1 glyc[e] ->	0	0	100000
74	EX_glc	glucose export	G export	1 glc[e] ->	0	-100	-100
75	EX_2dhglcn	2-ketogluconate export	G export	1 2dhglcn[e] ->	0	0	100000
76	EX_nh4	ammonia export	G export	1 nh4[e] ->	1	-100000	100000
77	EX_o2	o2 export	G export	1 o2[e] ->	1	-100000	100000
78	EX_etoh	ethanol export	G export	1 etoh[e] ->	0	0	100000
79	EX_co2	co2 export	G export	1 co2[e] ->	1	-100000	100000
80	EX_lac	lactose export	G export	1 lac[e] ->	0	0	100000
81	EX_ac	acetate export	G export	1 ac[e] ->	0	0	100000
82	EX_acald	acetaldehyde export	G export	1 acald[e] ->	0	0	100000
83	EX_acin	acetoin export	G export	1 acin[e] ->	0	0	100000
84	EX_dha	dihydroxyacetone export	G export	1 dha[e] ->	0	0	100000
85	EX_h2o	h20 export	G export	1 h2o[e] ->	1	-100000	100000
86	EX_h	h export	G export	1 h[e] ->	1	-100000	100000
87	EX_pyruvate	pyruvate export	G export	1 pyr[e] ->	0	0	100000
88	EX_pi	phosphate export	G export	1 pi[c] ->	1	-100000	100000
89	EX_e4p	erythrose-4-phosphate export	G export	1 e4p[c] ->	0	0	100000
93	EX_glyca	glycerate export	G export	1 glyca[e] ->	0	0	100000
94	EX_xyl	xylose export	G export	1 xyl[e] ->	0	0	100000
95	EX_fru	fructose export	G export	1 fru[e] ->	0	0	100000
96	EX_glcn	gluconate export	G export	1 glcn[e] ->	0	0	100000
54	T_glcn	gluconate transport	H transport	1 glcn[e] -> 1 glcn[c]	1	-100000	100000
55	T_glc	glucose transport	H transport	1 glc[e] -> 1 glc[c]	1	-100000	100000
56	T_fru	fructose transport	H transport	1 fru[e] -> 1 fru[c]	1	-100000	100000
57	T_xyl	xylose transport	H transport	1 xyl[e] -> 1 xyl[c]	1	-100000	100000
58	T_glyc	glycerol transport	H transport	1 glyc[e] -> 1 glyc[c]	1	-100000	100000
59	T_2dhglcn	2-ketogluconate transport	H transport	1 2dhglcn[e] -> 1 2dhglcn[c]	1	-100000	100000
60	T_nh4	ammonia transport	H transport	1 nh4[e] -> 1 nh4[c]	1	-100000	100000
61	T_o2	oxygen transport	H transport	1 o2[e] -> 1 o2[c]	1	-100000	100000
62	T_etoh	ethanol transport	H transport	1 etoh[e] -> 1 etoh[c]	1	-100000	100000
63	T_co2	carbon dioxide transport	H transport	1 co2[e] -> 1 co2[c]	1	-100000	100000
64	T_lac	lactate transport	H transport	1 lac[e] -> 1 lac[c]	1	-100000	100000
65	T_ac	acetate transport	H transport	1 ac[e] -> 1 ac[c]	1	-100000	100000
66	T_acald	acetaldehyde transport	H transport	1 acald[e] -> 1 acald[c]	1	-100000	100000
67	T_acin	acetoin transport	H transport	1 acin[e] -> 1 acin[c]	1	-100000	100000
68	T_dha	dixydroxyacetone transport	H transport	1 dha[e] -> 1 dha[c]	1	-100000	100000
69	T_h2o	h20 transport	H transport	1 h2o[e] -> 1 h2o[c]	1	-100000	100000
70	T_pyr	pyruvate transport	H transport	1 pyr[e] -> 1 pyr[c]	1	-100000	100000
71	T_h	h transport	H transport	1 h[e] -> 1 h[c]	1	-100000	100000
92	T_glyca	glycerate transport	H transport	1 glyca[e] -> 1 glyca[c]	1	-100000	100000
1	PGI	glucose-6-phosphate isomerase	I misc	1 g6p[c] -> 1 f6p[c]	1	-100000	100000
3	FK	fructokinase	I misc	1 atp[c] + 1 fru[c] -> 1 f6p[c] + 1 adp[c] + 1 h[c]	0	0	100000
14	TPI	triose-phosphate isomerase	I misc	1 gap[c] -> 1 dhap[c]	1	-100000	100000
38	G3PDH	glycerol-3-phosphate dehydrogenase (NADPH+)	I misc	1 nadp[c] + 1 glyc3p[c] -> 1 h[c] + 1 nadph[c] + 1 dhap[c]	1	-100000	100000
39	G3PDHQ	glycerol-3-phosphate dehydrogenase (quinone)	I misc	1 q[c] + 1 glyc3p[c] -> 1 h[c] + 1 qh2[c] + 1 dhap+	1	-10000	10000
40	GLYCK	glycerate kinase	I misc	1 atp[c] + 1 glyca[c] -> 1 adp[c] + 1 h[c] + 1 3pg[c]	0	0	100000
41	GLYK	glycerol kinase	I misc	1 atp[c] + 1 glyc[c] -> 1 adp[c] + 1 h[c] + 1 glyc3p[c]	0	0	100000
43	DAPP	dihydroxyacetone-P phosphatase	I misc	1 h2o[c] + 1 dhap[c] -> 1 pi[c] + 1 dha[c]	1	0	100000
46	GL	gluconolactonase	I misc	1 h2o[c] + 1 gllc[e] -> 1 h[c] + 1 glcn[e]	0	0	100000
47	G2DH	gluconate 2-dehydrogenase	I misc	1 nadp[c] + 1 glcn[c] -> 1 h[c] + 1 nadph[c] + 1 2dhglcn[c]	1	-100000	100000
48	GFOR	glucose-fructose oxidoreductase	I misc	1 fru[e] + 1 glc[e] -> 1 gllc[e] + 1 sbt[e]	1	-100000	100000
50	GLCNK	gluconokinase	I misc	1 atp[c] + 1 glcn[c] -> 1 adp[c] + 1 h[c] + 1 pgl[c]	0	0	100000
51	CAH	carboanhydrase	I misc	1 h2o[c] + 1 co2[c] -> 1 h[c] + 1 hco3[c]	1	-100000	100000
90	XYLI	xylose isomerase	I misc	1 xyl[c] -> 1 xylu[c]	1	-100000	100000
91	XYLUK	xylulose kinase	I misc	1 atp[c] + 1 xylu[c] -> 1 adp[c] + 1 xylu5p[c]	0	0	100000

## Sheet: metabolites
Abbreviation	Name	Formula	Charge	Compartment	KEGG ID	PubChem ID	ChEBI ID
13dpg[c]	3-Phospho-D-glyceroyl phosphate; 1,3-Bisphospho-D-glycerate; 3-phosphonato-D-glyceroyl phosphate(4-)	C3H4O10P2	-4	Cytosol	C00236	439191	57604
2dhglcn[c]	2-Dehydro-D-gluconate;	C6H9O7	-1	Cytosol	C06473	50	16808
2dhglcn[e]	2-Dehydro-D-gluconate;	C6H9O7	-1	external	C06473	50	16808
2pg[c]	2-Phospho-D-glycerate; D-Glycerate 2-phosphate; 2-phosphonato-D-glycerate(3-)	C3H4O7P	-3	Cytosol	C00631	439278	58289
3pg[c]	3-Phospho-D-glycerate; D-Glycerate 3-phosphate; 3-Phospho-(R)-glycerate; 3-phosphonato-D-glycerate(3-)	C3H4O7P	-3	Cytosol	C00197	439183	58272
ac[c]	Acetate; Glacial acetic ; acetate	C2H3O2	-1	Cytosol	C00033	176	30089
ac[e]	Acetate; Glacial acetic ; acetate	C2H3O2	-1	external	C00033	176	30089
acald[c]	Acetaldehyde; Ethanal; acetaldehyde	C2H4O	0	Cytosol	C00084	177	15343
acald[e]	Acetaldehyde; Ethanal; acetaldehyde	C2H4O	0	external	C00084	177	15343
accoa[c]	Acetyl-CoA; Acetyl coenzyme A; acetyl-CoA(4-)	C23H34N7O17P3S	-4	Cytosol	C00024	6302	57288
acin[c]	(R)-Acetoin; (R)-2-Acetoin; (R)-3-Hydroxy-2-butanone; (R)-Dimethylketol; (R)-3-Hydroxybutan-2-one	C4H8O2	0	Cytosol	C00810	439314	15688
acin[e]	(R)-Acetoin; (R)-2-Acetoin; (R)-3-Hydroxy-2-butanone; (R)-Dimethylketol; (R)-3-Hydroxybutan-2-one	C4H8O2	0	external	C00810	439314	15688
adp[c]	ADP; Adenosine 5'-diphosphate;	C10H12N5O10P2	-3	Cytosol	C00008	6022	456216
akg[c]	2-Oxoglutarate; 2-oxoglutarate(2-)	C5H4O5	-2	Cytosol	C00026	51	16810
atp[c]	ATP; Adenosine 5'-triphosphate; ATP(4-)	C10H12N5O13P3	-4	Cytosol	C00002	5957	30616
biomass[c]	Biomass
cis-aconitate[c]	cis-Aconitate; cis-aconitate(3-)	C6H3O6	-3	Cytosol, Extra-organism, Periplasm	C00417	643757	16383
cit[c]	Citrate; Citric acid; 2-Hydroxy-1,2,3-propanetricarboxylic acid; 2-Hydroxytricarballylic acid;	C6H5O7	-3	Cytosol, Extra-organism, Periplasm	C00158	311	16947
co2[c]	CO2; Carbon dioxide;	CO2	0	Cytosol, Extra-organism, Periplasm	C00011	280	16526
co2[e]	CO2; Carbon dioxide;	CO2	0	external	C00011	280	16526
coa[c]	CoA; Coenzyme A; CoA-SH; coenzyme A(4-)	C21H32N7O16P3S	-4	Cytosol, Extra-organism	C00010	6816	57287
dgp[c]	2-Dehydro-3-deoxy-6-phospho-D-gluconate; 6-Phospho-2-dehydro-3-deoxy-D-gluconate; 2-Keto-3-deoxy-6-phosphogluconate; 2-Dehydro-3-deoxy-D-gluconate 6-phosphate; 2-dehydro-3-deoxy-6-phosphonato-D-gluconate(3-)	C6H8O9P	-3	Cytosol	C04442		57569
dha[c]	Glycerone; Dihydroxyacetone; 1,3-Dihydroxyacetone; 1,3-Dihydroxy-2-propanone; 1,3-Dihydroxypropan-2-one;	C3H6O3	0	Cytosol, Extra-organism, Periplasm	C00184		16016
dha[e]	Glycerone; Dihydroxyacetone; 1,3-Dihydroxyacetone; 1,3-Dihydroxy-2-propanone; 1,3-Dihydroxypropan-2-one;	C3H6O3	0	external	C00184		16016
dhap[c]	Glycerone phosphate; Dihydroxyacetone phosphate; glycerone phosphate(2-)	C3H5O6P	-2	Cytosol	C00111		57642
e4p[c]	D-Erythrose 4-phosphate;	C4H7O7P	-2	Cytosol	C00279		16897
etoh[c]	ethanol	C2H6O	0	Cytosol	C00469	702	16236
etoh[e]	ethanol	C2H6O	0	external	C00469	702	16236
f6p[c]	D-Fructose 6-phosphate; beta-D-fructofuranose 6-phosphate(2-)	C6H11O9P	-2	Cytosol	C00085		57634
fru[c]	beta-D-Fructose; beta-Fruit sugar; beta-D-arabino-Hexulose; beta-Levulose; Fructose;	C6H12O6	0	Cytosol	C02336		15824
fru[e]	beta-D-Fructose; beta-Fruit sugar; beta-D-arabino-Hexulose; beta-Levulose; Fructose;	C6H12O6	0	external	C02336		15824
fum[c]	Fumarate; fumarate(2-)	C4H2O4	-2	Cytosol	C00122		29806
g6p[c]	alpha-D-Glucose 6-phosphate;	C6H11O9P	-2	Cytosol	C00668		58225
gap[c]	(2R)-2-Hydroxy-3-(phosphonooxy)-propanal; D-Glyceraldehyde 3-phosphate; D-glyceraldehyde 3-phosphate(2-)	C3H5O6P	-2	Cytosol	C00118		59776
gl6p[c]	D-Glucono-1,5-lactone 6-phosphate; 6-Phospho-D-glucono-1,5-lactone; 6-O-phosphonato-D-glucono-1,5-lactone(2-)	C6H9O9P	-2	Cytosol	C01236		57955
glc[c]	D-Glucose; Grape sugar; beta-D-glucose	C6H12O6	0	Cytosol	C00031		15903
glc[e]	D-Glucose; Grape sugar; beta-D-glucose	C6H12O6	0	external	C00031		15903
glcn[c]	D-Gluconate;	C6H11O7	-1	Cytosol	C00257		18391
glcn[e]	D-Gluconate;	C6H11O7	-1	external	C00257		18391
gllc[e]	D-gluconolactone	C6H10O6	0	Cytosol	C00198	3498	24267
glyc[c]	Glycerol; Glycerin; 1,2,3-Trihydroxypropane; 1,2,3-Propanetriol	C3H8O3	0	Cytosol	C00116	3416	17754
glyc[e]	Glycerol; Glycerin; 1,2,3-Trihydroxypropane; 1,2,3-Propanetriol	C3H8O3	0	external	C00116	3416	17754
glyc3p[c]	sn-Glycerol 3-phosphate; sn-Gro-1-P; Glycerol-3-phosphate;	C3H7O6P	-2	Cytosol	C00093	3393	57597
glyca[c]	D-Glycerate; Glycerate; (R)-Glycerate; Glyceric acid	C3H5O4	-1	Cytosol	C00258	3557	16659
glyca[e]	glycerate	C3H5O4	-1	external	C00258	3557	16659
h[c]	H_plus; hydron	H	1	Cytosol	C00080	3380	15378
h[e]	H_plus; hydron	H	1	external	C00080	3380	15378
h2o[c]	H2O; Water;	H2O	0	Cytosol	C00001	3303	15377
h2o[e]	H2O; Water;	H2O	0	external	C00001	3303	15377
hco3[c]	HCO3-; Bicarbonate; Hydrogencarbonate; Acid carbonate;	CHO3	-1	Cytosol	C00288	3583	17544
icit[c]	Isocitrate;	C6H5O7	-3	Cytosol	C00311	3605	30887
lac[c]	(R)-Lactate; D-Lactate; D-Lactic acid; D-2-Hydroxypropanoic acid; D-2-Hydroxypropionic acid;	C3H5O3	-1	Cytosol	C00256	3555	16004
lac[e]	(R)-Lactate; D-Lactate; D-Lactic acid; D-2-Hydroxypropanoic acid; D-2-Hydroxypropionic acid;	C3H5O3	-1	external	C00256	3555	16004
mal[c]	(S)-Malate; L-Malate; (S)-malate(2-)	C4H4O5	-2	Cytosol	C00149		15589
nad[c]	NADplus; NAD; Nicotinamide adenine dinucleotide; DPN; Diphosphopyridine nucleotide; Nadide; NAD(1-)	C21H26N7O14P2	-1	Cytosol	C00003	3305	57540
nadh[c]	NADH; DPNH; NADH(2-)	C21H27N7O14P2	-2	Cytosol	C00004	3306	57945
nadp[c]	NADPplus; NADP; Nicotinamide adenine dinucleotide phosphate; beta-Nicotinamide adenine dinucleotide phosphate; TPN; Triphosphopyridine nucleotide; NADP(3-)	C21H25N7O17P3	-3	Cytosol	C00006	3308	58349
nadph[c]	NADPH; TPNH; NADPH(4-)	C21H26N7O17P3	-4	Cytosol	C00005	3307	57783
nh4[c]	NH4; Amonium	NH4	1	Cytosol			28938
nh4[e]	NH4; Amonium	NH4	1	external			28938
o2[c]	Oxygen; O2;	O2	0	Cytosol	C00007	3309	57502
o2[e]	Oxygen; O2;	O2	0	external	C00007	3309	57502
oaa[c]	Oxaloacetate; keto-Oxaloacetate; oxaloacetate(2-)	C4H2O5	-2	Cytosol	C00036	3338	16452
pep[c]	Phosphoenolpyruvate; Phosphoenolpyruvic acid; PEP;	C3H2O6P	-3	Cytosol	C00074	3374	58702
pgl[c]	6-Phospho-D-gluconate;	C6H10O10P	-3	Cytosol	C00345	3638	58759
pi[c]	Phosphate; hydrogenphosphate	HO4P	-2	Cytosol	C00009	3311	43474
pyr[c]	pyruvate	C3H3O3	-1	Cytosol			15361
pyr[e]	pyruvate	C3H3O3	-1	external			15361
q[c]	Ubiquinone	C14H18O4	0	Cytosol	C01317
qh2[c]	Ubiquinol	C14H20O4	0	Cytosol	C00390
r5p[c]	D-Ribose 5-phosphate; Ribose 5-phosphate; D-ribose 5-phosphate(2-)	C5H9O8P	-2	Cytosol	C00117	24794349	58273
ru5p[c]	D-Ribulose 5-phosphate;	C5H9O8P	-2	Cytosol	C00199	3499	58121
s7p[c]	D-Sedoheptulose 7-phosphate; D-altro-Heptulose 7-phosphate; sedoheptulose 7-phosphate(2-)	C7H13O10P	-2	Cytosol	C05382		57483
sbt[e]	D-Sorbitol; D-Glucitol; L-Gulitol; Sorbitol	C6H14O6	0	Cytosol	C00794	4052	17924
xyl[c]	D-Xylose; Wood sugar; D-xylopyranose	C5H10O5	0	Cytosol	C00181	3481	53455
xyl[e]	D-Xylose; Wood sugar; D-xylopyranose	C5H10O5	0	external	C00181	3481	53455
xylu[c]	xylulose	C5H10O5	0	Cytosol	C00310	3604	17140
xylu5p[c]	D-Xylulose 5-phosphate; D-xylulose 5-phosphate(2-)	C5H9O8P	-2	Cytosol	C00231	3530	57737

## Sheet: biomass composition
POLYMER AND BIOMASS COMPOSITION
Precursor amount in mmol/g dry weight
according to De Graaf et al. 1999
		G6P	F6P	Ri5P	E4P	GAP	PGA	PEP	PYR	AcCoA	OAA	AKG	CO2	NADPH	CoA	NADP
	Protein			0.136	0.135		1.142	0.216	3.582	0.369	1.401	0.734	-0.791	18.49
	RNA			0.6			0.35				0.25		0.6	0.406
	DNA			0.087			0.044				0.044		0.087	0.174
	Lipids					0.12	0.12			1.976			-1.976	3.615
	Peptidoglycan		0.055					0.028	0.083	0.055	0.028	0.028	-0.055	0.193
	Glycogen	0.154
	C1_unit						0.049							0.049
	Polyamines											0.059		0.18
	Sum	0.154	0.055	0.823	0.135	0.12	1.705	0.244	3.665	2.4	1.723	0.821	-2.135	23.107	-2.4	-23.107
	Carbon content															Sum
	C-atoms	6	6	5	4	3	3	3	3	2	4	5	1
	per precursor	0.924	0.33	4.115	0.54	0.36	5.115	0.732	10.995	4.8	6.892	4.105	-2.135			36.773
	Abbreviations	G6P	glucose-6-phosphate
		F6P	fructose-6-phosphate
		Ri5P	ribose-5-phosphate
		E4P	erythrose-4-phosphate
		GAP	glyceraldehyde 3-phosphate
		PGA	3-phosphoglyceric acid
		PEP	phosphoenolpyruvate
		PYR	pyruvate
		AcCoA	acetyl coenzyme A
		OAA	oxaloacetate
		AKG	alpha-ketoglutarate
		CO2	carbon dioxide
		NADPH	nicotinamide adenine dinucleotide phosphate
		CoA	coenzyme A
